# Supplementary material
Source: publisher figshare collection journal article supplement (https://acs.figshare.com/ndownloader/files/9206623)
Supplement: Supplementary file 1 [file 9206623]

# Multifunctional, Self-activating Oxygen rich Holey Carbon Monolith derived from Agarose Biopolymer

*Vikrant Sahu,<sup>†</sup> Ram Bhagat Marichi,<sup>†</sup> Gurmeet Singh\* and Raj Kishore Sharma\*\**

Department of Chemistry, University of Delhi, Delhi-110007, India

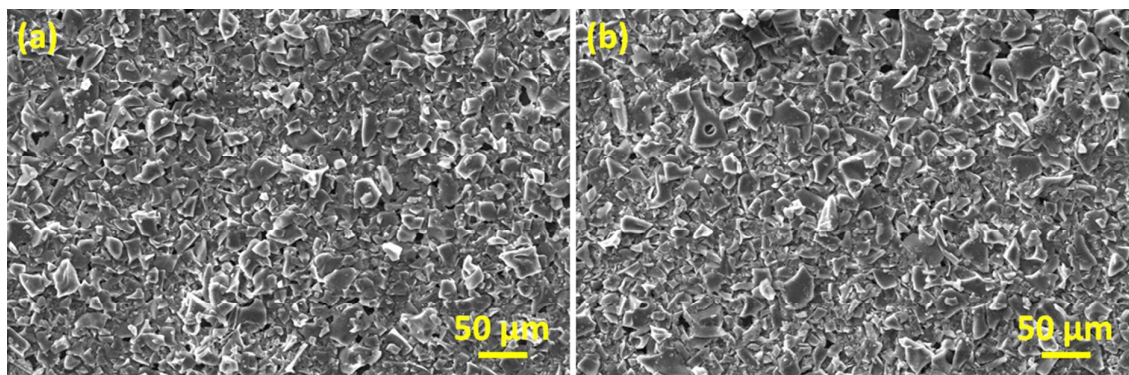

**Figure S1.** SEM microstructures; (a) before GCD and (b) after 5000 GCD cycles at  $3.75 \text{ A g}^{-1}$  of CAR 900 electrode.
